# Supplementary material
Source: publisher figshare collection journal article supplement (https://acs.figshare.com/ndownloader/files/4240258)

# Supplementary Information

## Molecular dynamics simulations of the adsorption of BMP-2 on surfaces with medical relevance

*Tillmann Utesch, Grazia Daminelli, Maria Andrea Mroginski\**

Technische Universität Berlin, Institut für Chemie, Sekr. PC 14, 10623 Berlin, Germany

### Content

- 1) Total energy curves for BMP2 thermal equilibration (Fig S1)
- 2) rmsd curves for SMD step (Fig S2)
- 3) Final structures of BMP2 adsorbed on surfaces (Fig S3,S4)
- 4) Desorption curves (Fig S5-FigS7 )

**Figure S1:** Total energy curves for BMP2/graphite and BMP2/TiO<sub>2</sub> during the 200 ps thermal equilibration step

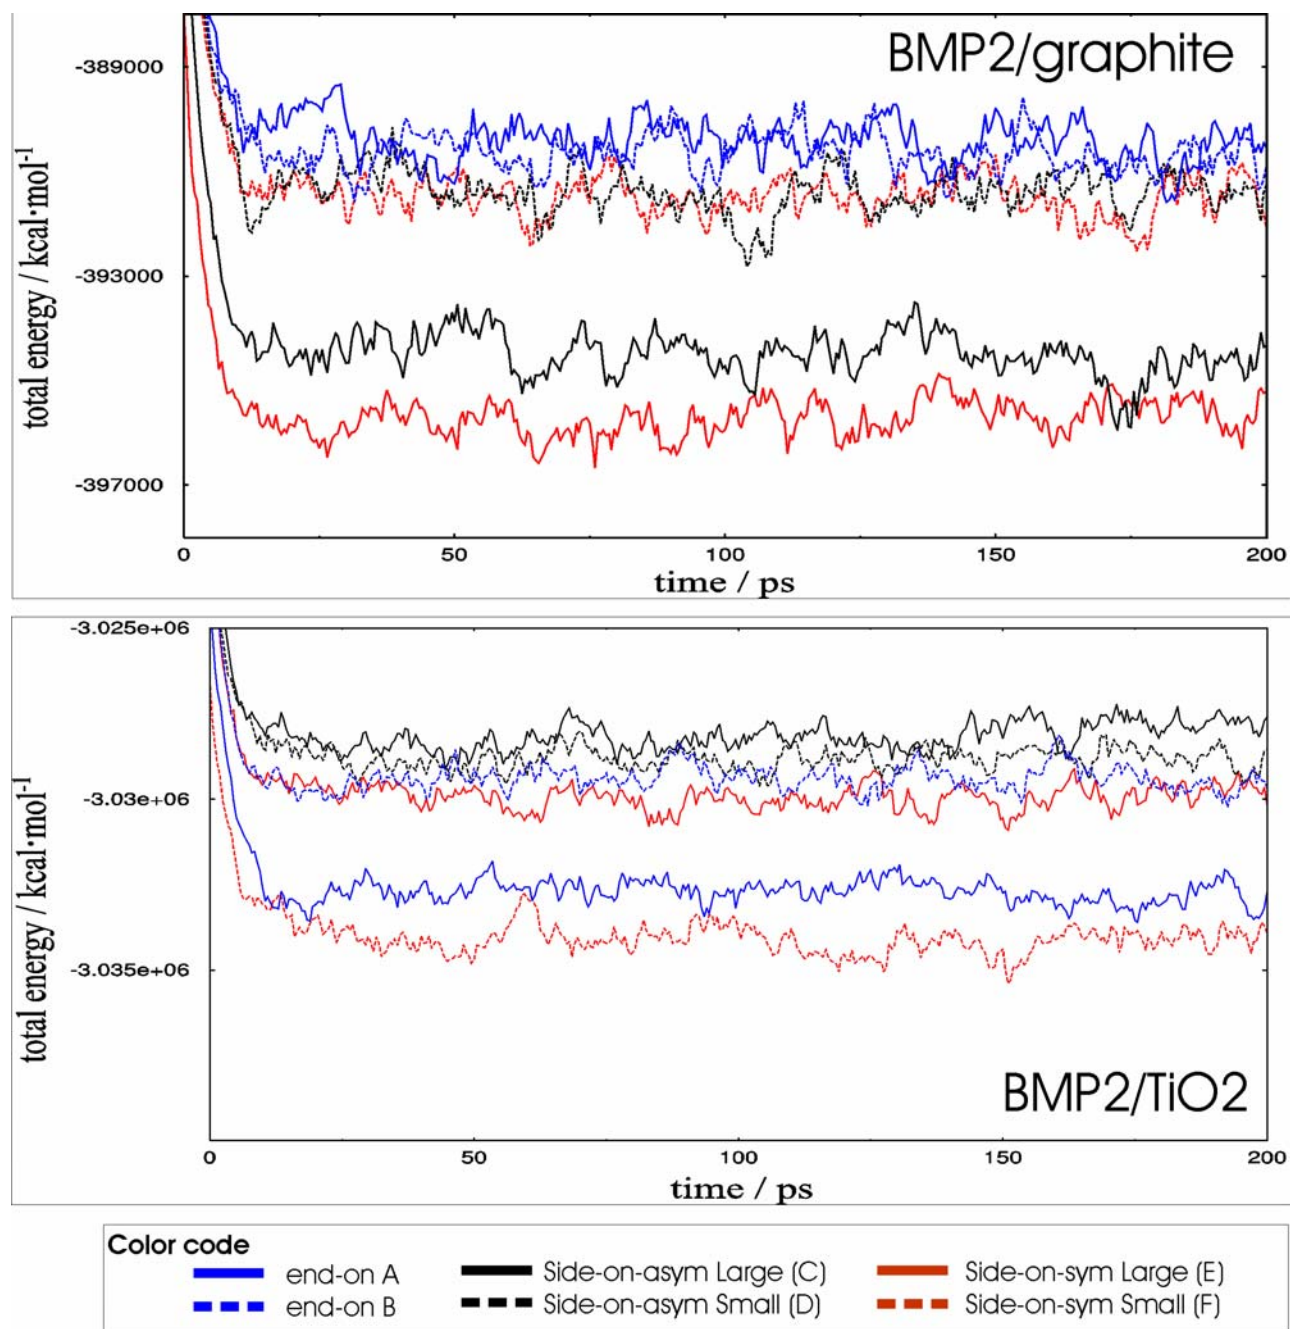

**Figure S2:** Root mean square deviation (rmsd) curves for heavy atoms on the BMP2 backbone during the SMD simulations of BMP2/graphite and BMP2/TiO<sub>2</sub> systems

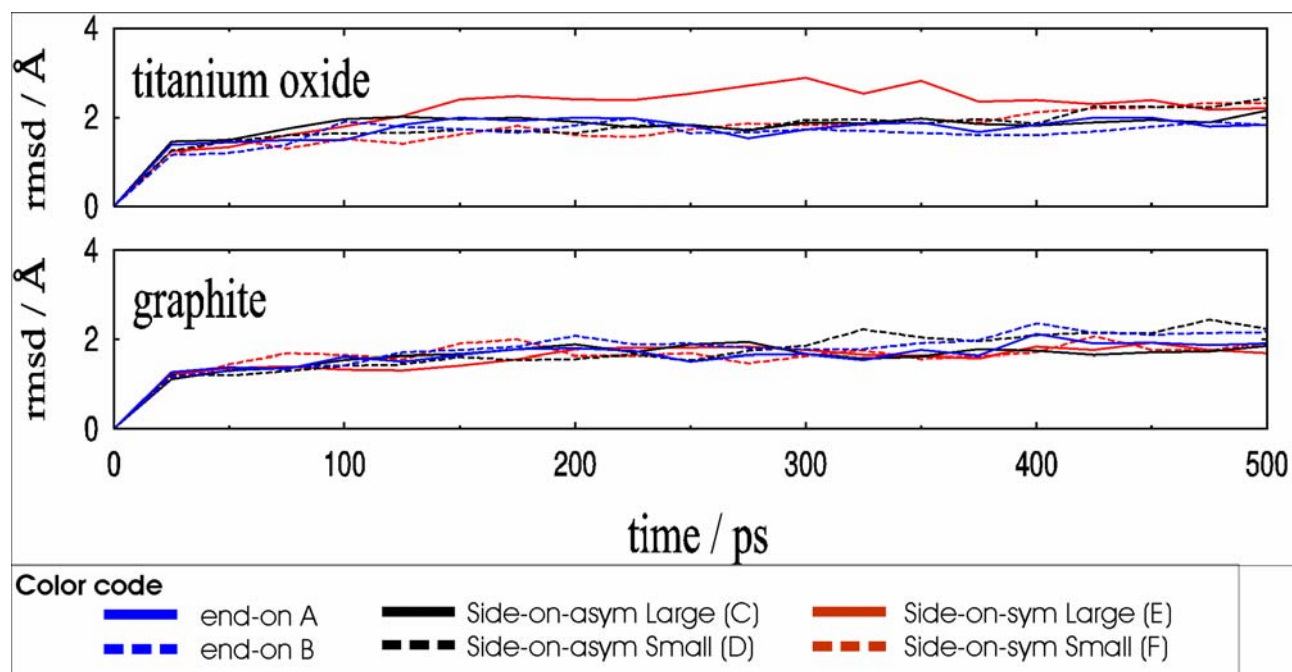

Figure S3: Final structures of BMP2 adsorbed on graphite surfaces

end on A

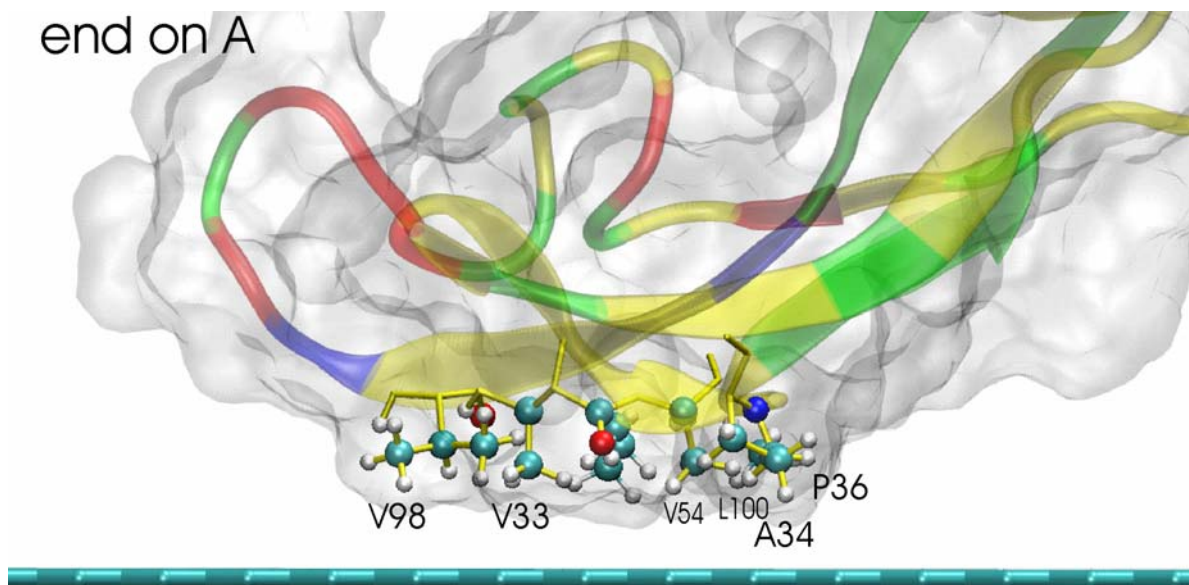

end on B

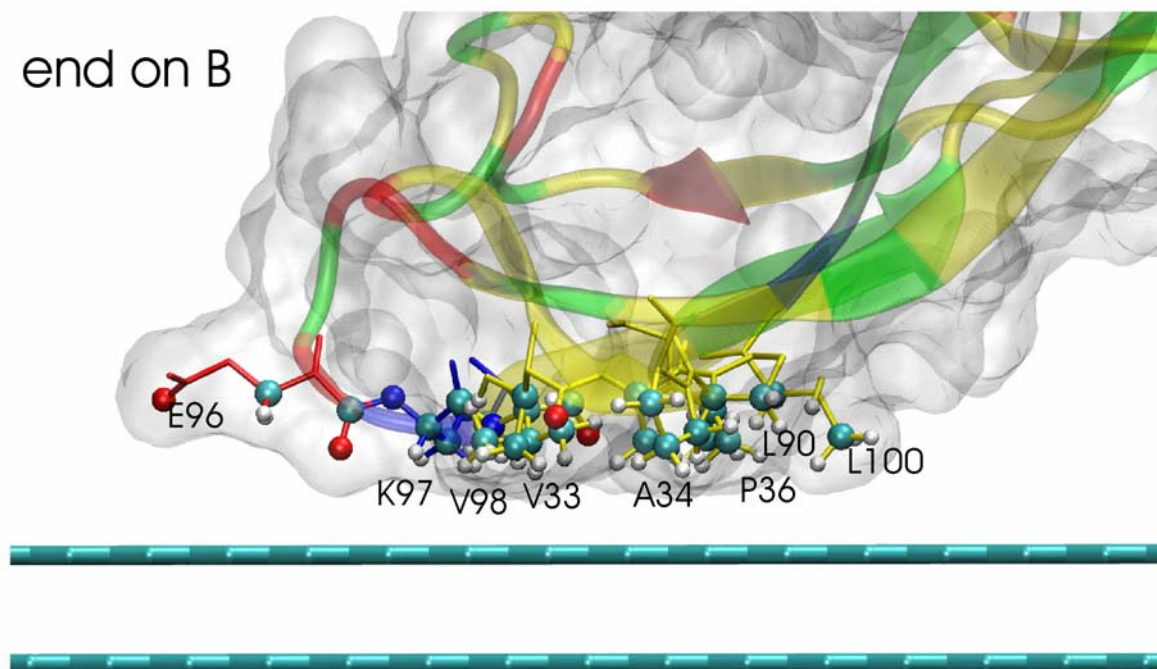

Figure S4: Final structures of BMP2 adsorbed on graphite surfaces

### side-on-asym Large

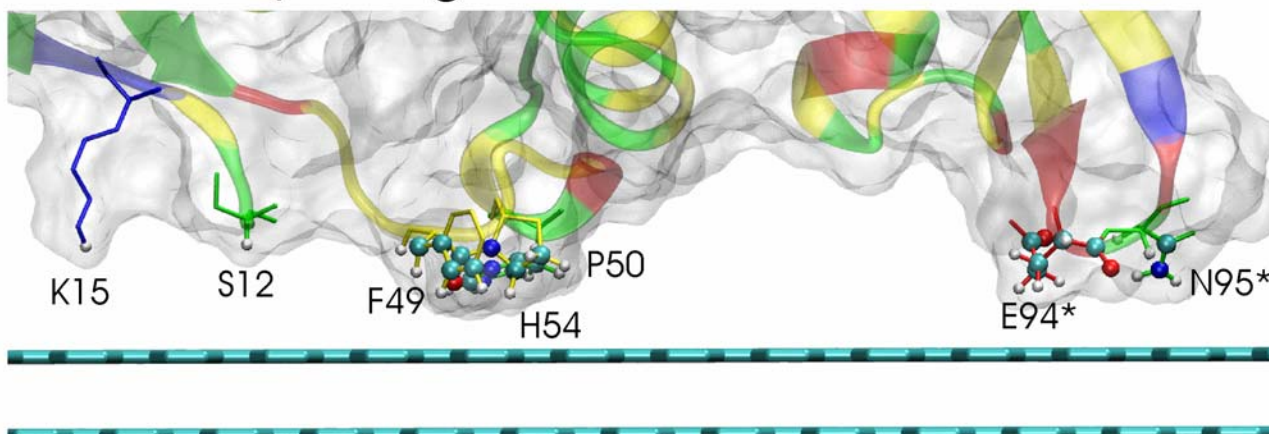

### side-on-asym Small

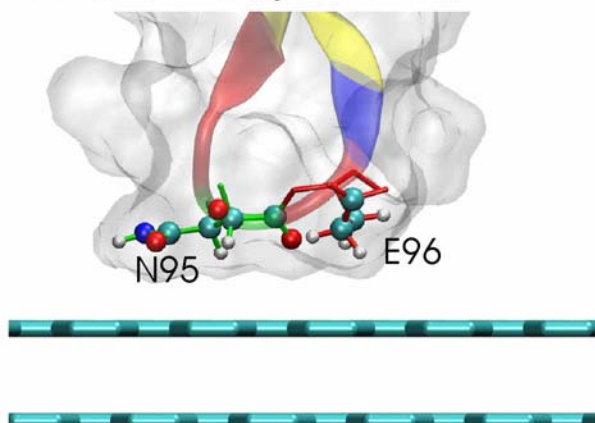

### side-on-sym Small

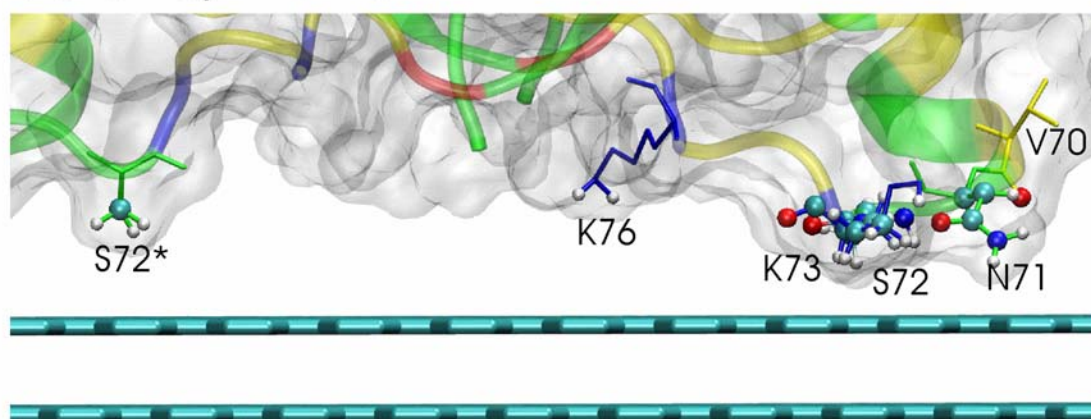



Figure S5: Desorption of BMP2 from the graphite forced by artificial forces pulling the dummy atom with a velocity  $v=0.25 \text{ \AA/ps}$  and a force constant  $k=50 \text{ kcal}/(\text{mol \AA})$ . For the End-on A and B orientations, pulling forces, interaction energy between graphite and BMP2 and the surface separation distance of selected residues are plotted during SMD desorption.

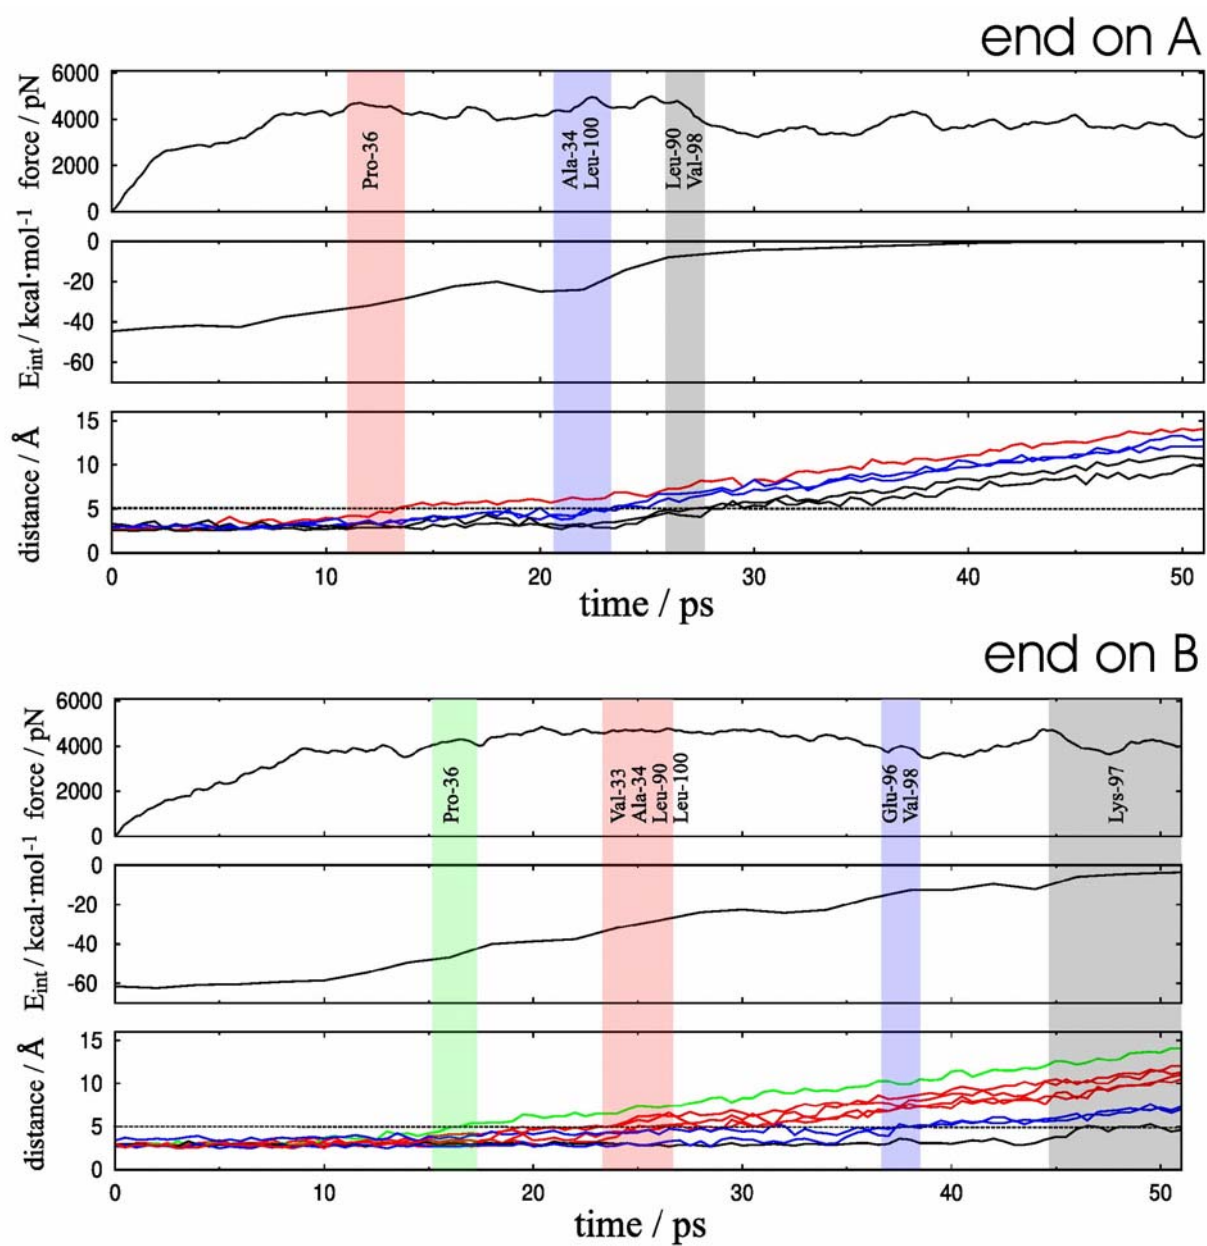

Figure S6: Desorption of BMP2 from the graphite forced by artificial forces pulling the dummy atom with a velocity  $v=0.25 \text{ \AA/ps}$  and a force constant  $k=50 \text{ kcal/(mol \AA)}$ . For the side-on asymmetric orientations, pulling forces, interaction energy between graphite and BMP2 and the surface separation distance of selected residues are plotted during SMD desorption.

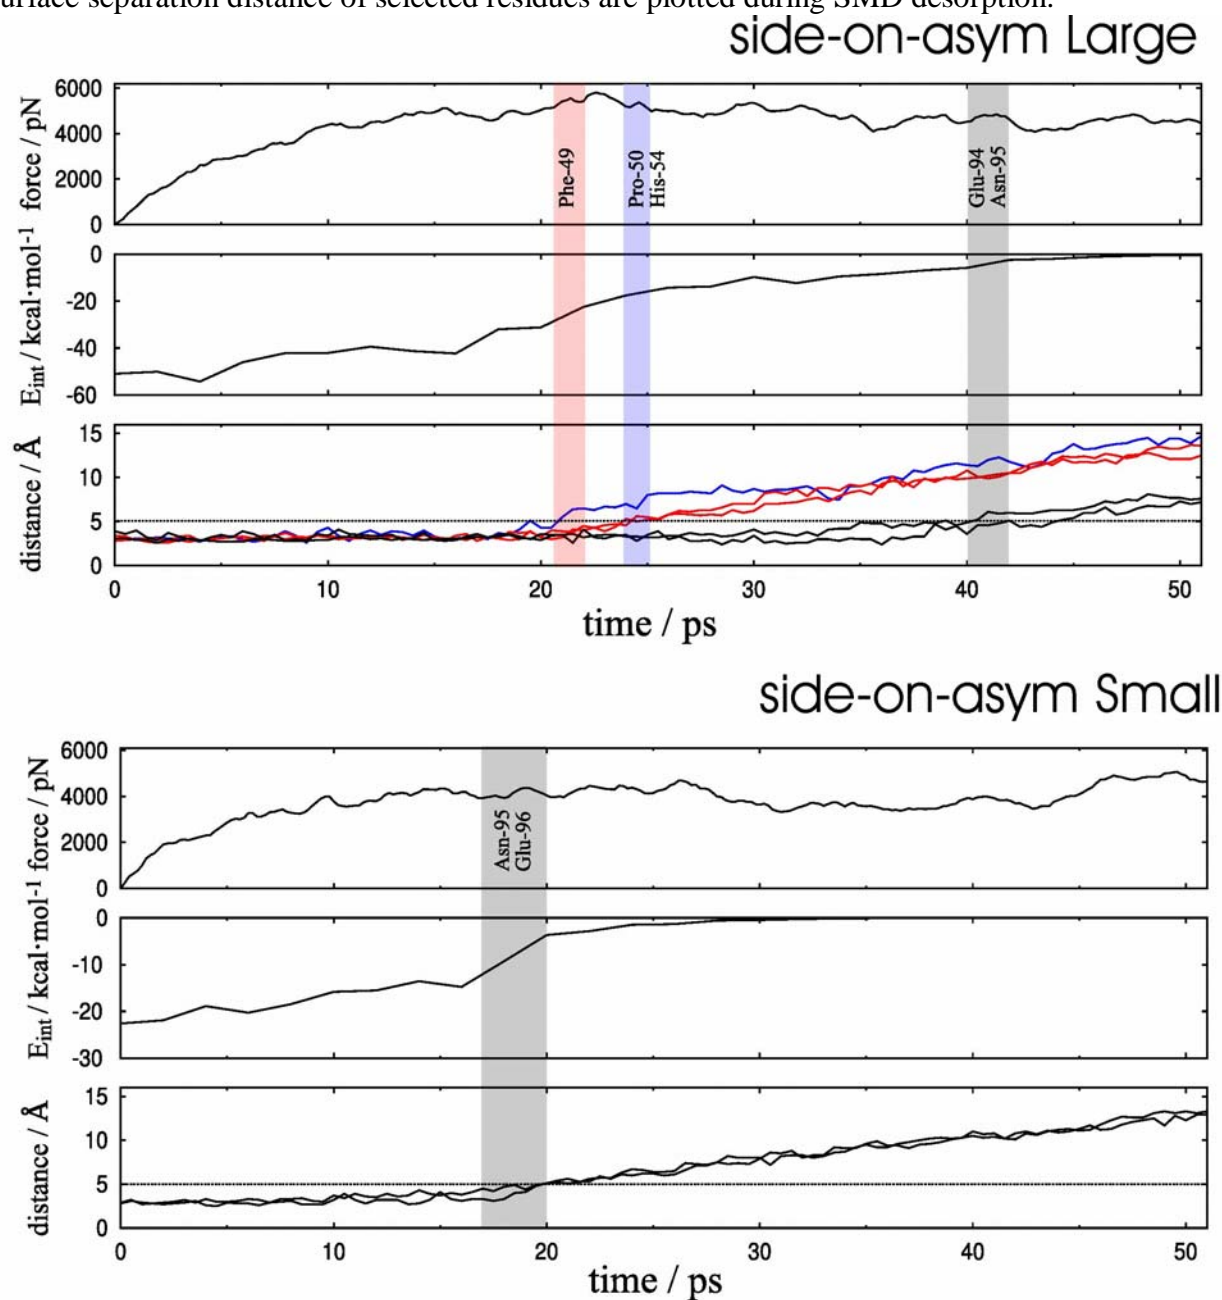

Figure S7: Desorption of BMP2 from the graphite forced by artificial forces pulling the dummy atom with a velocity  $v=0.25 \text{ \AA/ps}$  and a force constant  $k=50 \text{ kcal}/(\text{mol \AA})$ . For the side-on symmetric orientations, pulling forces, interaction energy between graphite and BMP2 and the surface separation distance of selected residues are plotted during SMD desorption.

side-on-sym Large

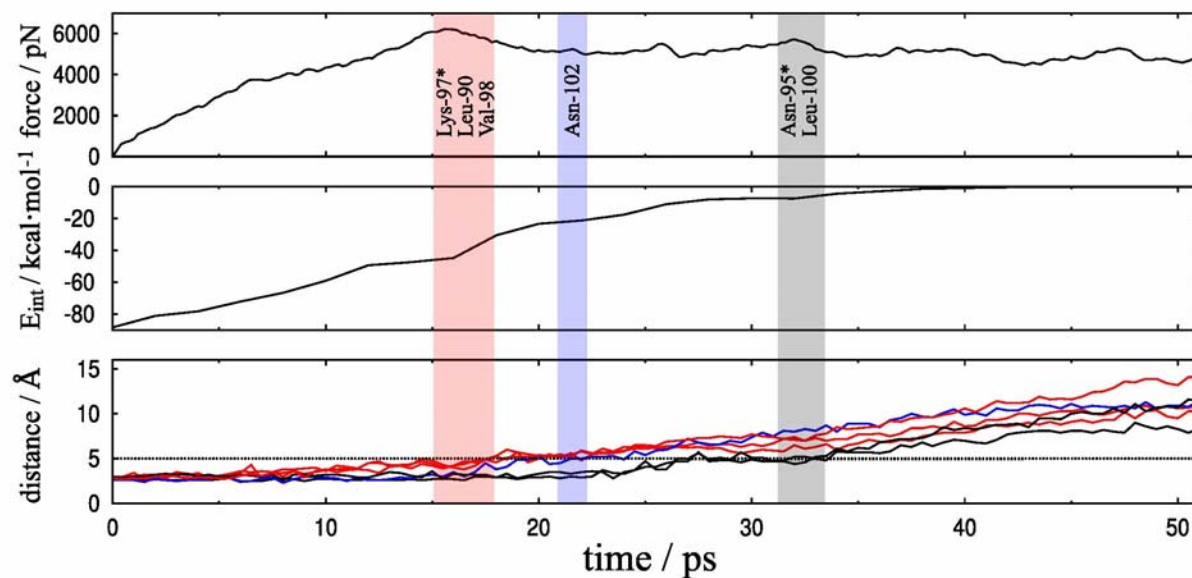

side-on-sym Small

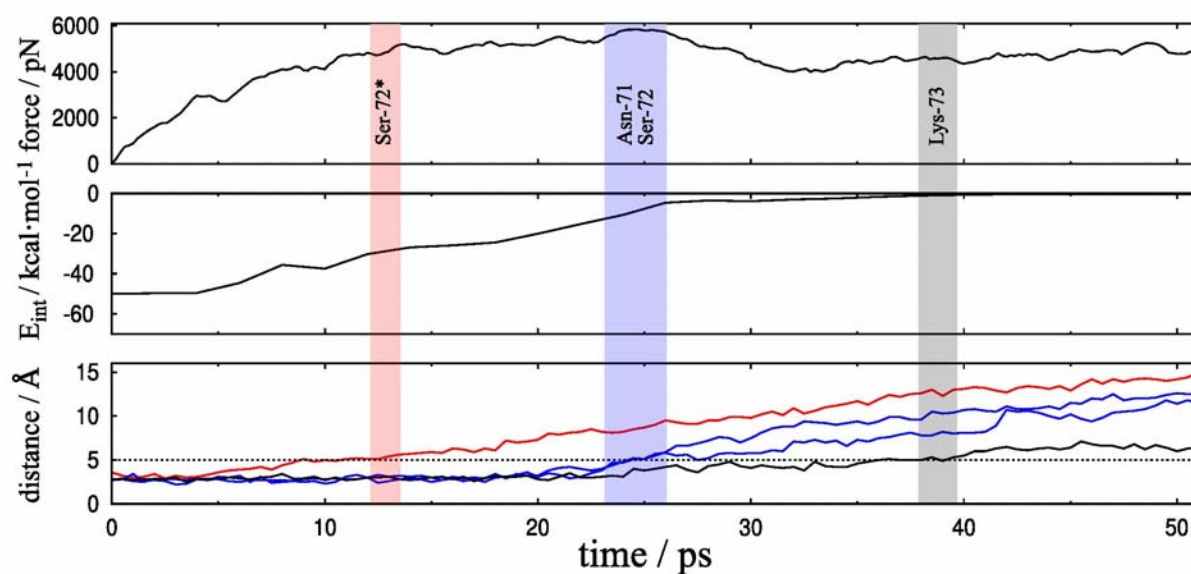

Supplement: Supplementary file 1 [file 4240258]
